15. Etsten, B. E.; Rheinlander, H. F.; Reynolds, R. N., and Li, T. H.: Cardiac Output and Related Hemodynamics During Cyclopropane Anesthesia in Humans, *Fed. Proc.* **13**: 1159 (March) 1954.
16. Crafoord, C.: Pulmonary Ventilation and Anesthesia in Major Chest Surgery, *J. Thoracic Surg.* **9**: 237 (Feb.) 1940.
17. Taylor, G., and Gerhøde, F.: Observations on Circulatory Effects of Short Duration Positive Pressure Pulmonary Inflation, *Surgery* **30**: 56, (July) 1951.
18. Etsten, B. E.; Rheinlander, H. F.; Reynolds, R. N., and Li, T. H.: Effect of Cyclopropane Anesthesia on Pulmonary Artery Pressure in Humans, *Surgical Forum: Clin. Congress of Am. College of Surgeons, Philadelphia*, W. B. Saunders Company, 1953, vol. 4, pp. 649.
19. Rodbard, S.: Bronchomotor Tone: Neglected Factor in Regulation of Pulmonary Circulation, *Am. J. Med.* **15**: 356 (Sept.) 1953.

## ANNUAL MEETING OF THE AMERICAN MEDICAL ASSOCIATION

### ATLANTIC CITY, NEW JERSEY

The Section on Anesthesiology of the American Medical Association will meet at 9:00 a.m. on June 8, 9 and 10 in the Ambassador Hotel. The following program has been announced:

#### Wednesday, June 8

- Fifty Years of Organized Anesthesia.* Albert M. Betcher, Benjamin J. Ciliberti, Paul M. Wood, and Lewis H. Wright.
- Controllable Analgesia During Surgery with Continuous Drip Meperidine: Analysis of 1,000 Cases.* H. M. Ausherman, W. K. Nowill, and C. R. Stephen.
- The Use of Chlorpromazine in the Anesthetic Management of 2,000 Patients.* Ellis K. Hultzman.
- Steroid Anesthesia: A Report on Its Use in Surgery.* Francis J. Murphy, Neri P. Gundagni, and Francis L. DeBon.
- The Use of Nisentil-Levallorphan Mixtures for the Supplementation of Nitrous Oxide-Oxygen Anesthesia.* Francis F. Foldes, Mark Swerdlow, E. Lipschitz, Gertrude Weber, and Leo A. Pirk.
- Management of Adrenocortical Insufficiency During Surgery.* Charles L. Burstein, James A. Nicholas, Charles J. Umberger, and Philip D. Wilson.

#### Thursday, June 9

- The Importance of Asphyxia Neonatorum: A Statistical Analysis.* Schuyler G. Kohl.
- Prevention of Asphyxia Neonatorum by the Obstetrician.* Nicholson J. Eastman.
- Prevention of Asphyxia Neonatorum by the Anesthesiologist.* Meyer Saklad.
- The Value of Drugs, Oxygen, and Carbon Dioxide as Stimulants to Respiration in the Apneic Infant.* Ralph M. Tovell.
- Morphology of the Newborn Infant's Lungs, as Related to Distensibility, Blood Supply, and Gas Exchange.* Edith Potter.
- Pressures and Volumes Involved in Expansion of the Newborn Infant's Lungs.* Richard Day.
- The Role of the Laryngologist in Resuscitation of the Newborn.* Paul H. Holinger.
- Methods of Resuscitating the Newborn Infant.* Practical discussion by all participants.

#### Friday, June 10

- The Influences of Anesthesia on Infant Mortality Rate in Cesarean Section.* P. C. Lund.
- The Twenty-Four Hour Medical Anesthesia Coverage for Obstetric Patients.* John J. Bonica.
- Anesthesia for Patients Undergoing Operations on the Mitral Valve: Review of Four Years' Experience.* Robert T. Patrick.
- Chairman's Address: Bellafoline in Clinical Anesthesia.* Ralph S. Sappenfield.
- A Study of the Mortality Rate in a Series of Cholecystectomies With and Without the Use of a Muscle Relaxant.* Paul H. Lorhan and C. C. Chen.
- An Evaluation of Antiemetic Drugs and Their Effect on Postoperative Nausea, Vomiting and Retching.* Mark R. Knapp and Henry K. Beecher.
